# Supplementary material
Source: Research Square preprint supplement (doi:10.21203/rs.3.rs-8649685/v1)
Supplement: Supplementary file 1 [file 22dd6fc1180bbae956771166.docx]

**Supplementary Information**


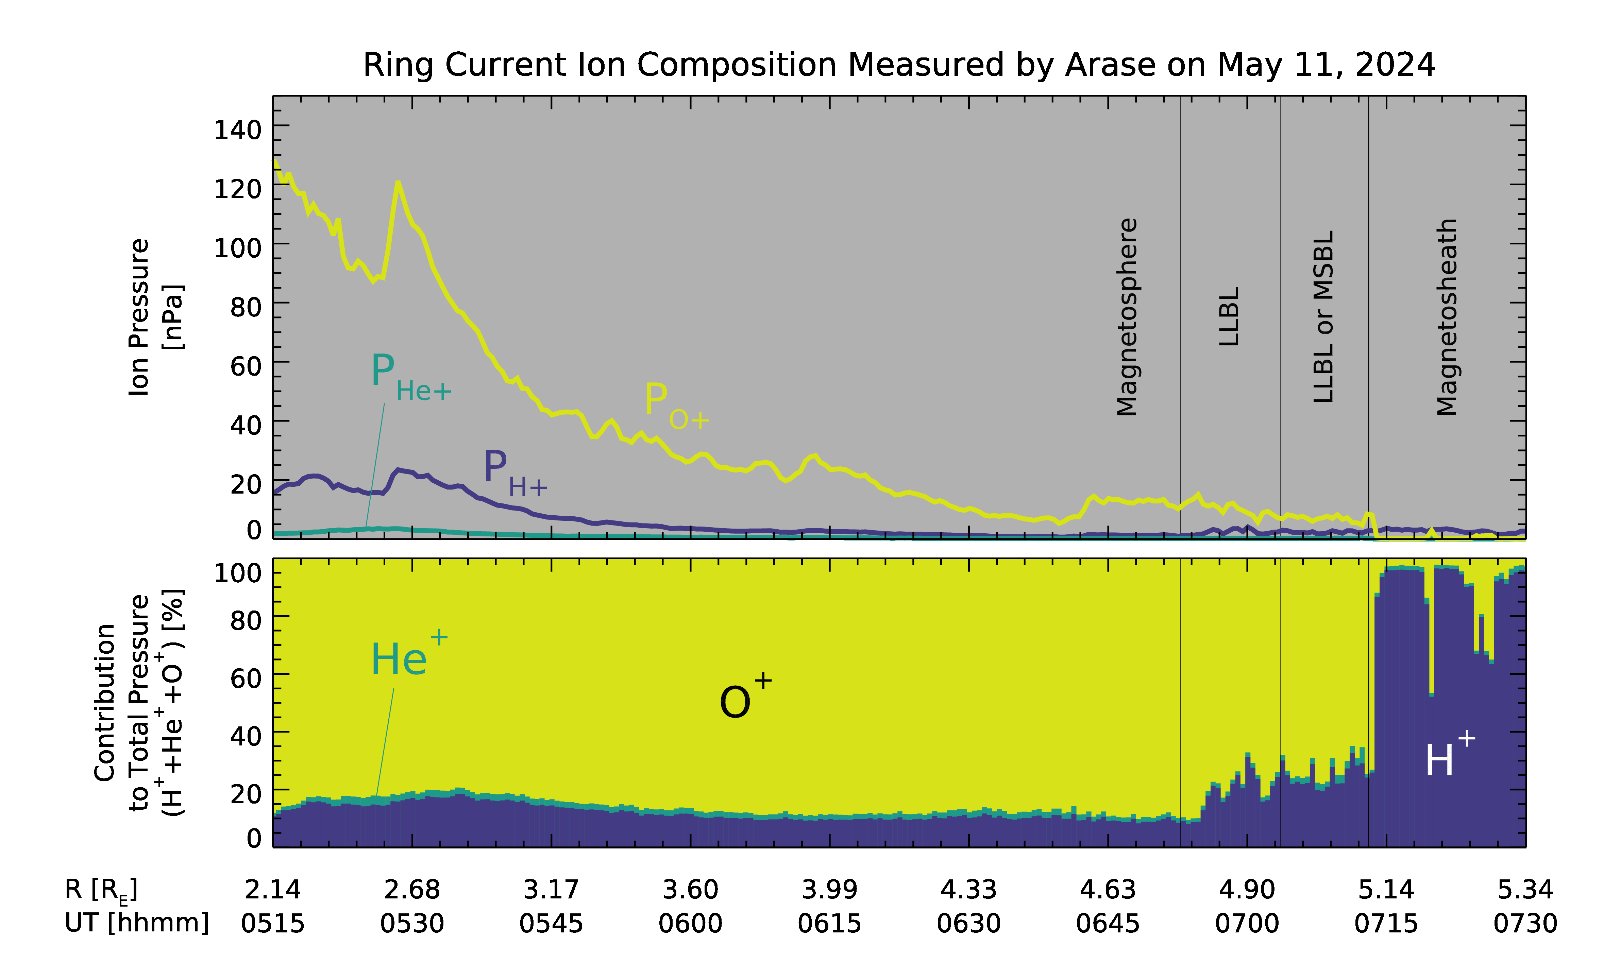


**Supplementary Information Fig. 1 | Ion thermal pressures of proton (H+), He+, and O+ and their contributions to total ion thermal pressure, showing O+ dominance (>80%) in the magnetosphere.** The total ion thermal pressure is the sum of the pressures of the three ion species. LEP-i (0.035–19.2 keV) and MEP-i (22.1–184.2 keV) measurements were used to calculate pressure. Notably, the proton count of LEP-i was saturated in the magnetosheath.


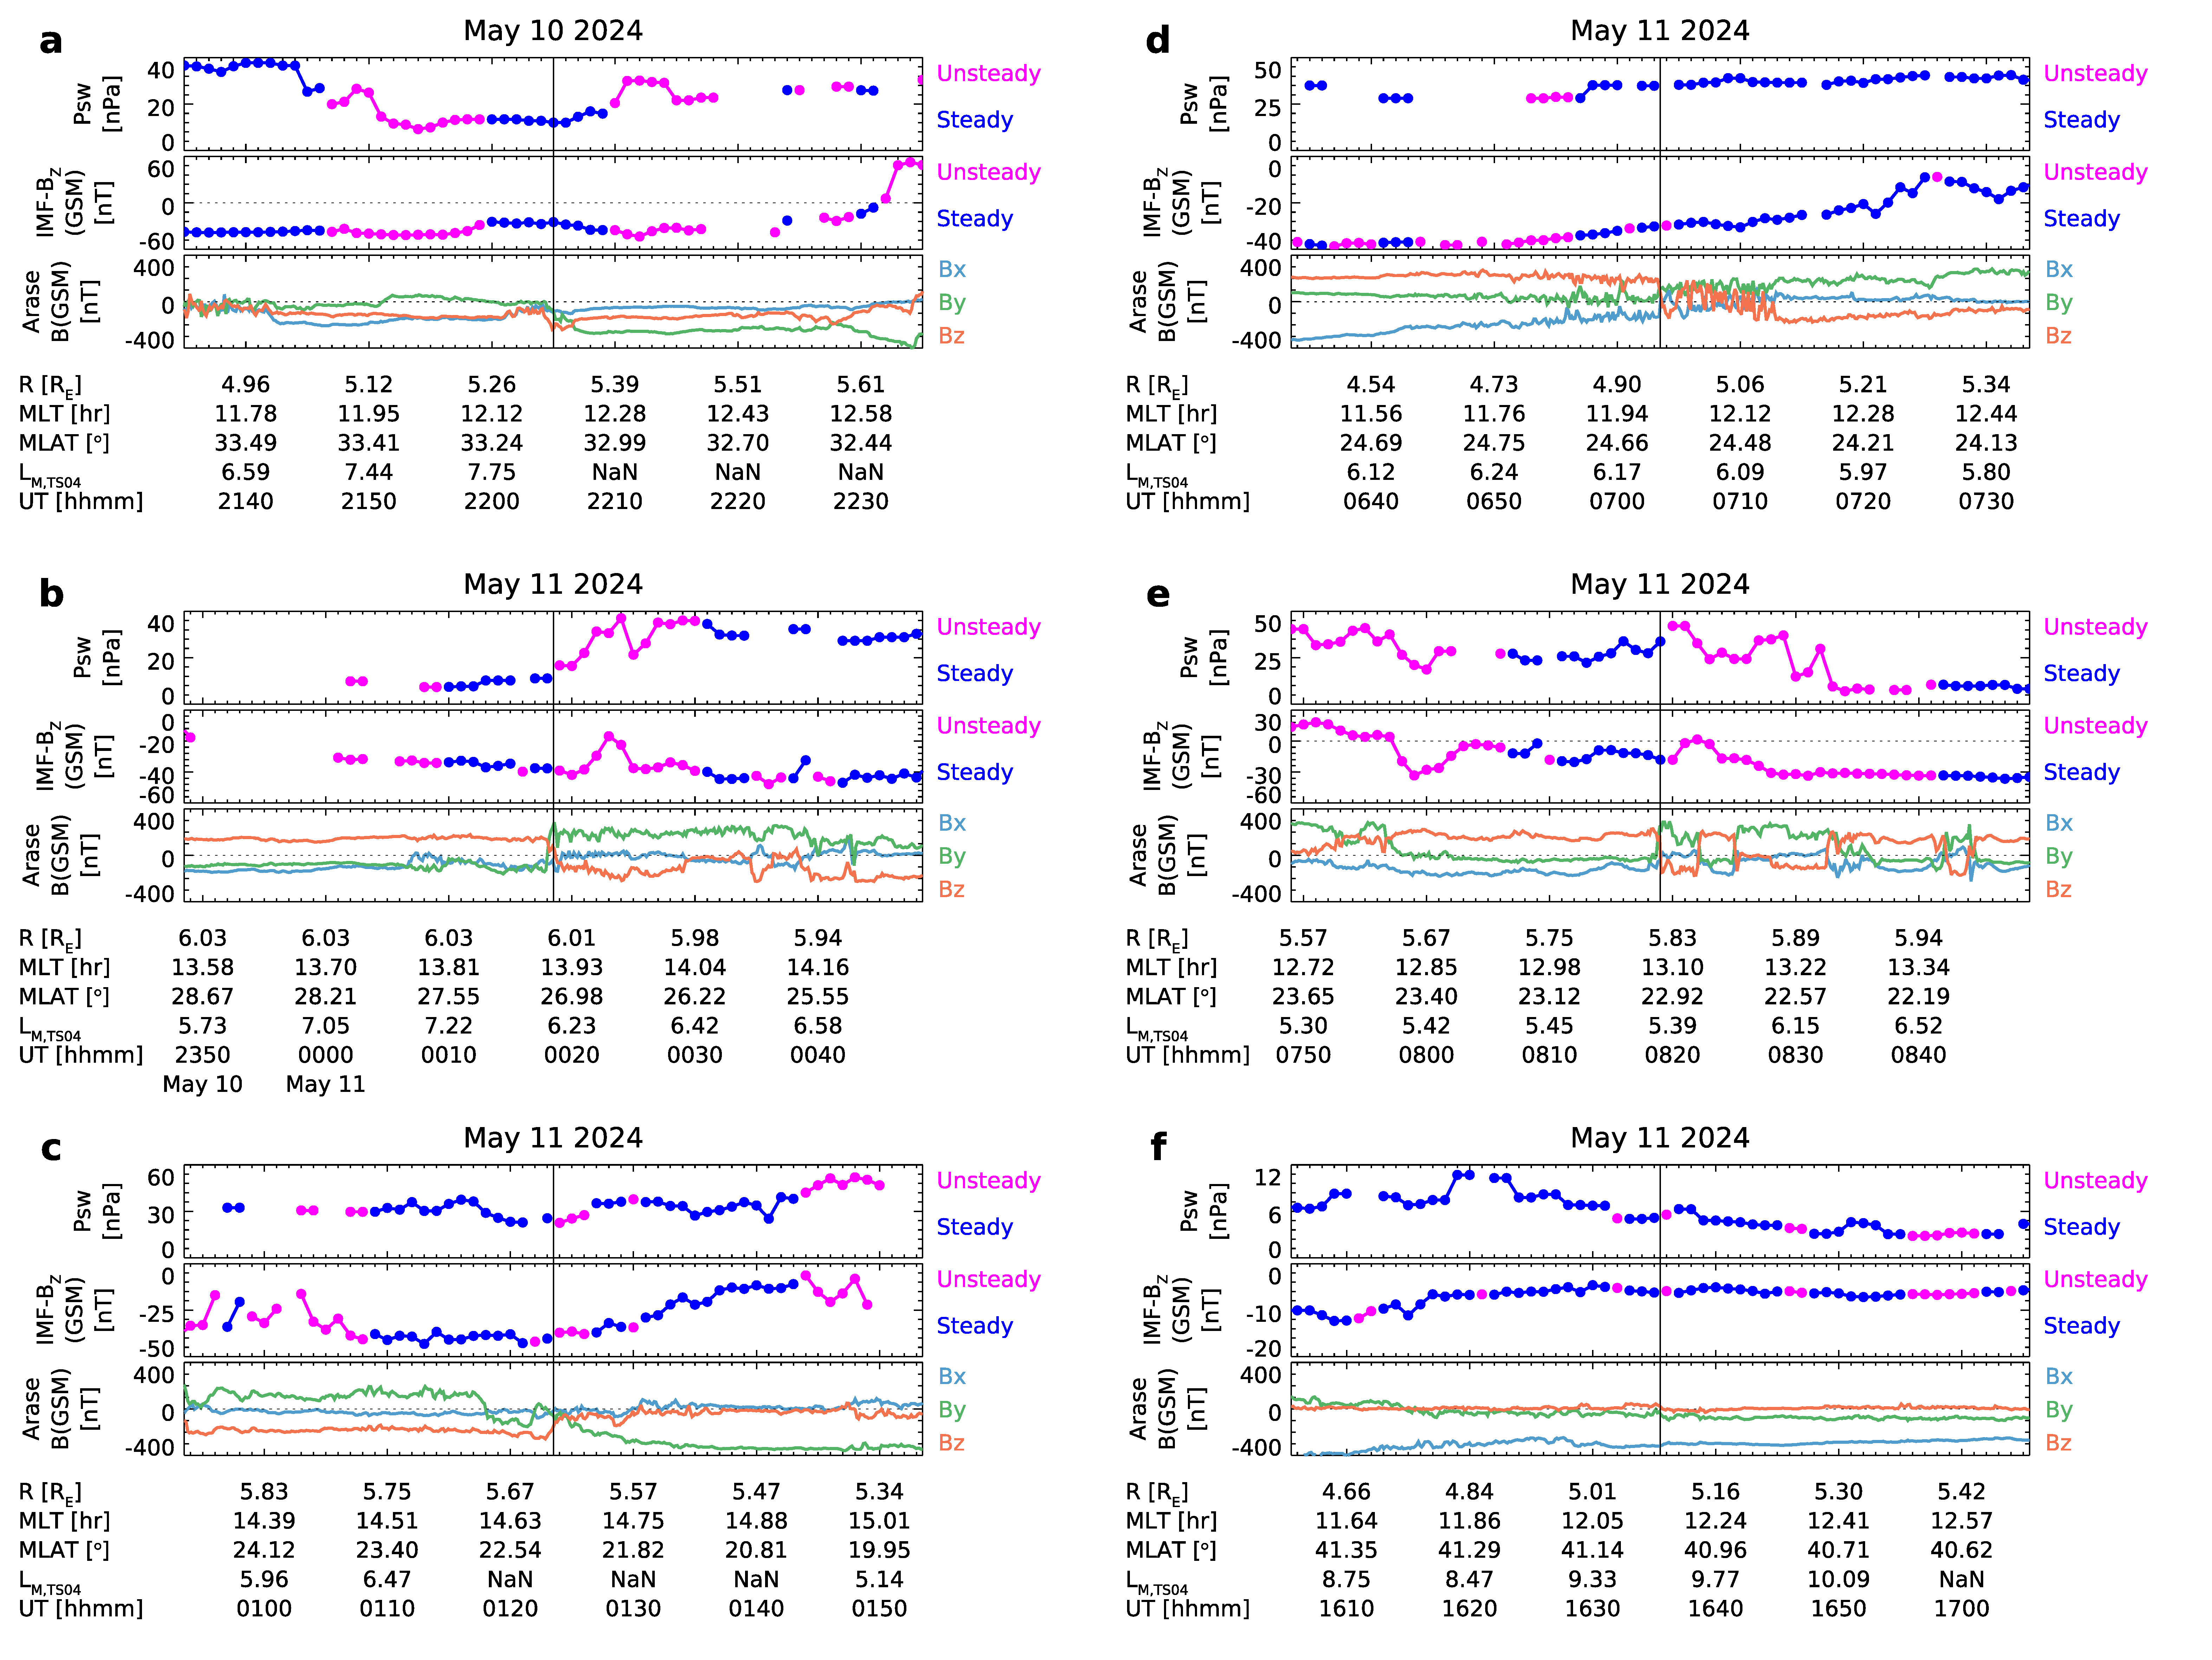


**Supplementary Information Fig. 2 | Magnetopause crossing by the Arase satellite under a steady solar wind during the May 2024 super geomagnetic storm.** Fromthe top of the panels, the solar wind dynamic pressure, the Z-component of IMF in the GSM coordinates, and the magnetic field vectors at Arase in the GSM coordinates are shown. The vertical lines indicate the timing of magnetopause crossing.
